# Supplementary material for: Dominant effect of increasing forest biomass on evapotranspiration: interpretations of movement in Budyko space
Source: Copernicus journal article supplement (doi:10.5194/hess-22-567-2018), 2018-01-23
Supplement: Supplementary file [file hess-22-567-2018-supplement.pdf]

Supplement of Hydrol. Earth Syst. Sci., 22, 567–580, 2018  
<https://doi.org/10.5194/hess-22-567-2018-supplement>  
© Author(s) 2018. This work is distributed under  
the Creative Commons Attribution 4.0 License.

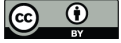

*Supplement of*

## **Dominant effect of increasing forest biomass on evapotranspiration: interpretations of movement in Budyko space**

**Fernando Jaramillo et al.**

*Correspondence to:* Fernando Jaramillo ([fernando.jaramillo@natgeo.su.se](mailto:fernando.jaramillo@natgeo.su.se))

The copyright of individual parts of the supplement might differ from the CC BY 4.0 License.

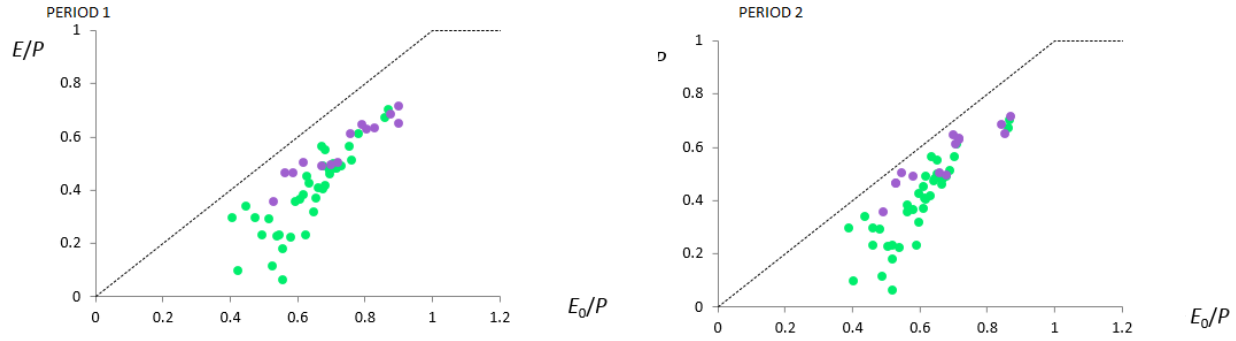

**Figure S1-** Mean hydroclimatic conditions of the 60 basins illustrated in Budyko space, in terms of the aridity index ( $E_0/P$ ; x-axis) and evaporative ratio ( $E/P$ ; y-axis) for temperate (purple) and boreal (green) basins during the periods (a) 1961-1986 and (b) 1987-2012.

**Table S1-** Statistical parameters of the linear regressions between the residual of the evaporative ratio, ( $E/P$ ), and the forest attributes of forest biomass ( $V$ ), forest cover ( $A$ ), forest composition ( $Q_v$ ) and fraction of precipitation falling as snow ( $f_s$ ) in the boreal and temperate basin groups. Results are shown for the regressions using annual ( $N=52$ ), three-year ( $N=17$ ) and five-year means ( $N=10$ ) during the period 1961-2012. Significant p-values are shown in bold font and shaded in grey, while nearly significant p-values ( $0.05 < p < 0.10$ ) shown in red font.

| Basin group | Time step  | $V$   |             |          | $A$   |         |           | $Q_v$ |         |           | $f_s$ |         |           |
|-------------|------------|-------|-------------|----------|-------|---------|-----------|-------|---------|-----------|-------|---------|-----------|
|             |            | $R^2$ | p-value     | m        | $R^2$ | p-value | m         | $R^2$ | p-value | m         | $R^2$ | p-value | m         |
| Boreal      | one-year   | 0.09  | <b>0.03</b> | 4.36E-04 | 0.02  | 0.50    | -2.39E-01 | 0.02  | 0.54    | -6.33E-02 | 0.03  | 0.29    | -1.21E-01 |
|             | three-year | 0.33  | <b>0.02</b> | 3.85E-04 | 0.06  | 0.48    | -2.35E-01 | 0.05  | 0.52    | -1.14E-01 | 0.27  | 0.06    | -2.55E-01 |
|             | five-year  | 0.58  | <b>0.01</b> | 1.08E-03 | 0.08  | 0.55    | -3.33E-01 | 0.10  | 0.52    | 4.49E-01  | 0.25  | 0.18    | -3.57E-01 |
| Temperate   | one-year   | 0.09  | <b>0.03</b> | 6.18E-04 | 0.07  | 0.08    | 3.53E-01  | 0.04  | 0.30    | 3.49E-01  | 0.00  | 0.66    | -4.64E-02 |
|             | three-year | 0.21  | 0.07        | 5.05E-04 | 0.14  | 0.19    | 2.70E-01  | 0.12  | 0.30    | 3.30E-01  | 0.08  | 0.29    | -1.37E-01 |
|             | five-year  | 0.20  | 0.21        | 8.56E-04 | 0.06  | 0.54    | 3.00E-01  | 0.10  | 0.51    | 3.65E-01  | 0.01  | 0.85    | -4.90E-02 |
